# Supplementary material for: BMP signalling differentially regulates distinct haematopoietic stem cell types
Source: PubMed Central journal article supplement (PMC4557333; doi:10.1038/ncomms9040), 2015-08-18
Supplement: ncomms9040-s1.pdf [file ncomms9040-s1.pdf]

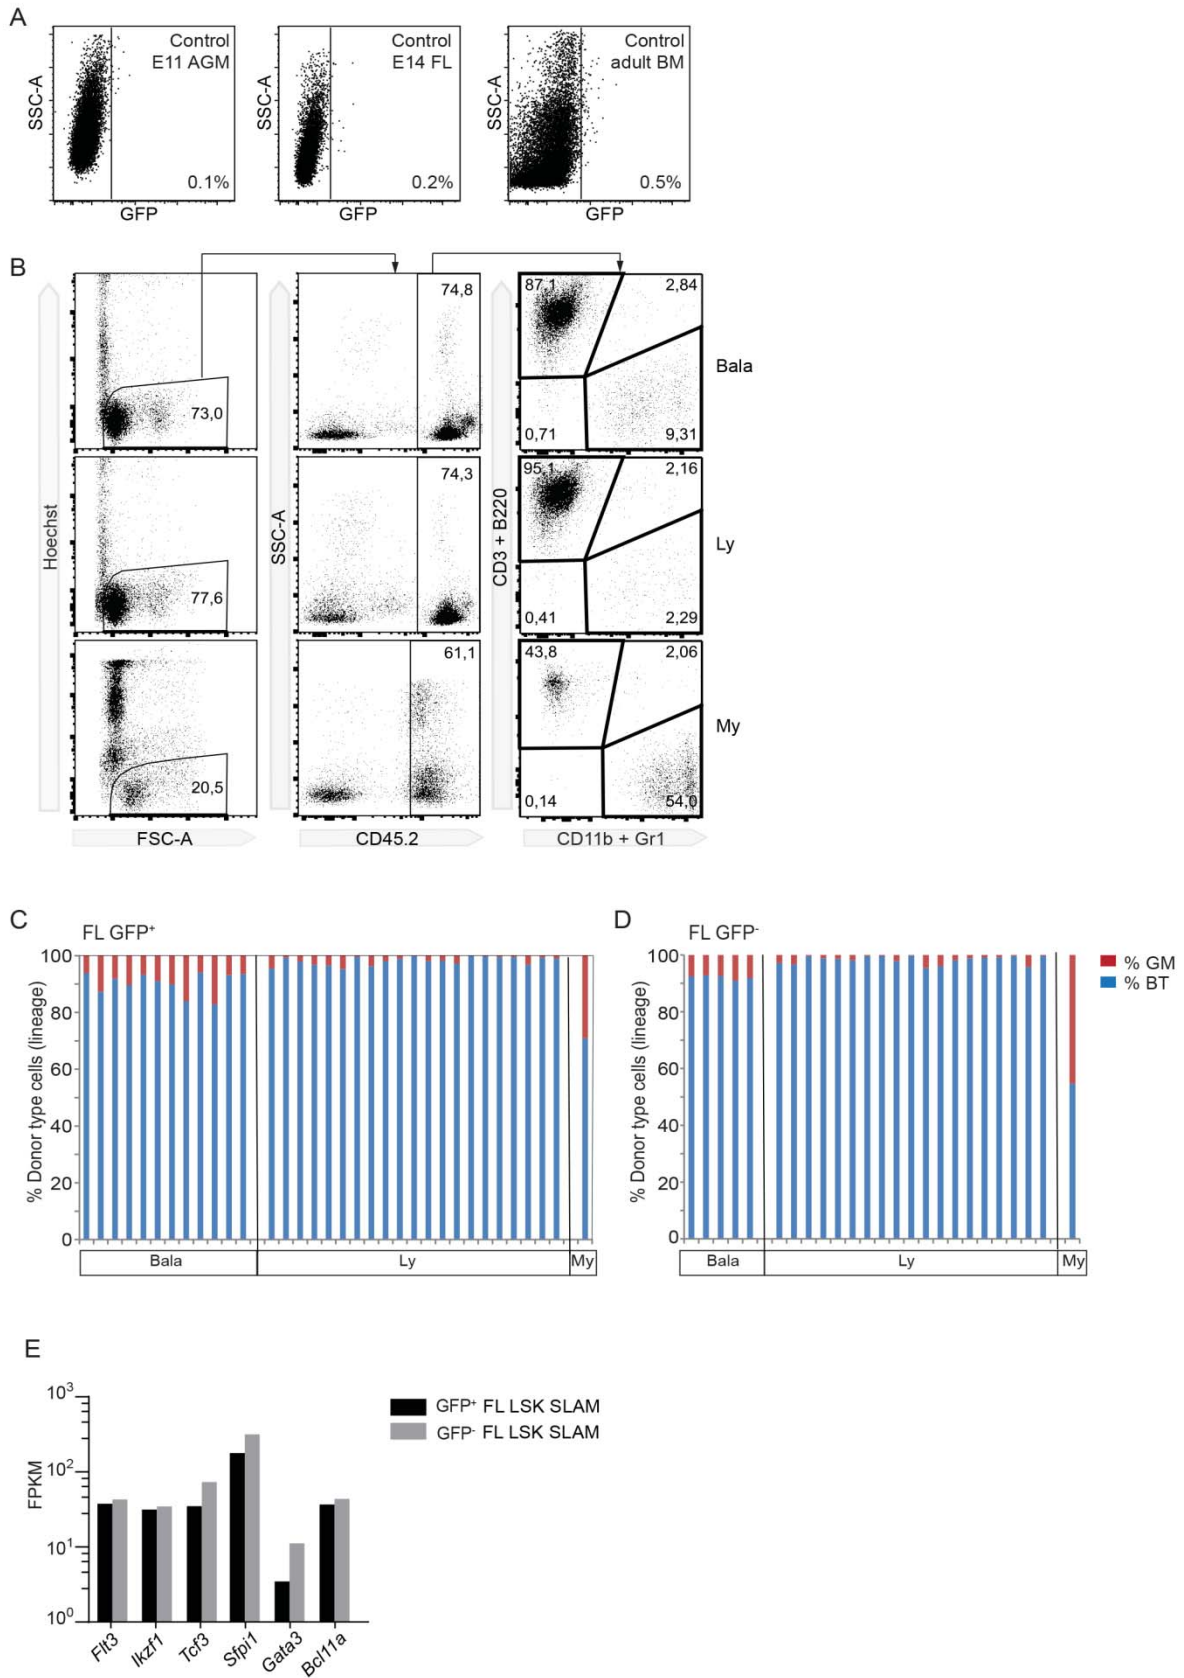

Figure S1

Supplementary Fig. 1

Supplementary Fig. 1. **Analysis of lineage output composition and gene expression of the two hematopoietic stem cell types.** (A) Flow cytometric negative control from non-transgenic E11 AGM, E14 FL and adult BM. (B) Representative example of flow cytometric analysis of a myeloid-lymphoid balanced HSC (Bala, upper row), lymphoid-biased HSC (Ly, middle row) and myeloid-biased HSC (My, bottom row) . Sorted GFP<sup>+</sup> and GFP<sup>-</sup> adult BM (from 14-32 week old) or E14 FL cells from *BRE-GFP* (Ly5.2) mice were injected intravenously into Ly5.1 irradiated (9Gy) recipients and donor chimerism measured at 4 months post-transplantation. Peripheral blood was analyzed for granulocyte-macrophage (GM) lineages (Gr-1 and CD11b) and B and T cell lineages (B220 and CD3) in the donor Ly5.2 cell marker expressing cells. Ratio between the Lymphoid (B+T) and Myeloid (GM) donor-derived GM and B+T (donor-derived) was calculated according to Cho et al<sup>1</sup> to reveal the clonal composition of the HSCs donor-derived in each recipient: My (0-4) Bala (4-16) and Ly (>16). Summary of lineage output analysis of repopulated recipient Ly5.1 mice (9Gy) injected with E14FL *BRE-GFP* Ly5.2 (C) GFP<sup>+</sup> and (D) GFP<sup>-</sup> cells at the clonal HSC level (n=4). Donor chimerism and lineage output in peripheral blood was measured at 4 months post-transplantation. (E) FPKM values for selected lymphoid genes expressed by GFP<sup>+</sup> and GFP<sup>-</sup> LSK SLAM sorted HSCs from E14 FL. SSC-A=side scatter analysis

## Supplementary Tables

Supplementary **Table 1.** *In vivo* limiting dilution transplantation results of primary recipients receiving GFP<sup>+</sup> and GFP<sup>-</sup> cells sorted from E14 fetal liver.

| Cell Type        | Cells (x10 <sup>3</sup> ) injected | Repopulated/transplanted mice | % Donor Chimerism | HSC Frequency | Average number HSCs/E14 FL |
|------------------|------------------------------------|-------------------------------|-------------------|---------------|----------------------------|
| GFP <sup>+</sup> | 3                                  | 5/5                           | 100               | 1/180*        | 2611**                     |
|                  | 1                                  | 3/3                           | 43-100            |               |                            |
|                  | 0.5                                | 3/3                           | 85-100            |               |                            |
|                  | 0.25                               | 8/10                          | 13-100            |               |                            |
|                  | 0.125                              | 1/6                           | 12                |               |                            |
|                  | 0.050                              | 2/6                           | 68-100            |               |                            |
|                  | 0.025                              | 1/4                           | 24                |               |                            |
|                  | 0.010                              | 0/2                           | 0                 |               |                            |
| GFP <sup>-</sup> | 388                                | 3/3                           | 100               | 1/20545*      | 595                        |
|                  | 100                                | 3/3                           | 100               |               |                            |
|                  | 30                                 | 5/8                           | 17-100            |               |                            |
|                  | 10                                 | 3/6                           | 19-100            |               |                            |
|                  | 6                                  | 2/6                           | 22-100            |               |                            |
|                  | 3                                  | 1/3                           | 69                |               |                            |
|                  | 1                                  | 0/3                           | 0                 |               |                            |
|                  | 0.5                                | 0/3                           | 0                 |               |                            |
|                  | 0.05                               | 0/3                           | 0                 |               |                            |

\* 95% Confidence Interval (lower/upper) frequency: for GFP<sup>+</sup>HSC (1 in 309/1 in 104) and for GFP<sup>-</sup> HSC (1 in 38314/1 in 11017), n=4.

\*\* p = 0.0001

FL=fetal liver

Supplementary **Table 2.** *In vivo* limiting dilution transplantation results of primary recipients receiving GFP<sup>+</sup> and GFP<sup>-</sup> cells sorted from adult bone marrow.

| Cell Type        | Cells (x10 <sup>4</sup> ) injected | Repopulated/transplanted mice | % Donor Chimerism | HSC Frequency | Average number HSCs/BM |
|------------------|------------------------------------|-------------------------------|-------------------|---------------|------------------------|
| GFP <sup>+</sup> | 1                                  | 6/6                           | 10-75             | 1/10053*      | 110                    |
|                  | 0.85                               | 1/6                           | 34                |               |                        |
|                  | 0.65                               | 2/6                           | 11,40             |               |                        |
|                  | 0.50                               | 2/6                           | 21,65             |               |                        |
|                  | 0.10                               | 0/3                           | 0                 |               |                        |
| GFP <sup>-</sup> | 10                                 | 6/6                           | 22-89             | 1/17760*      | 1064                   |
|                  | 5                                  | 5/6                           | 22-79             |               |                        |
|                  | 2.50                               | 5/6                           | 5-27              |               |                        |
|                  | 1                                  | 1/6                           | 11                |               |                        |

\* 95% Confidence Interval (lower/upper) frequency: for GFP<sup>+</sup>HSC (1 in 16995/1 in 5947) and for GFP<sup>-</sup> HSC (1 in 32925/1 in 9580), n=3. BM=bone marrow

Supplementary **Table 3.** Lineage output HSC distribution (percentages and absolute number) in the E14 FL and BM (BRE-GFP<sup>+</sup>, BRE-GFP<sup>-</sup> and Total).

| E14 FL   | BRE GFP+                    |           |                   | BRE GFP-                    |           |                   | Total             |           |
|----------|-----------------------------|-----------|-------------------|-----------------------------|-----------|-------------------|-------------------|-----------|
|          | subtype/total reconstituted | % subtype | Absolute cell no. | subtype/total reconstituted | % subtype | Absolute cell no. | Absolute cell no. | % subtype |
| Balanced | 12/34                       | 35        | 921               | 5/25                        | 20        | 119               | 1042              | 33        |
| Lymphoid | 21/34                       | 62        | 1612              | 19/25                       | 76        | 452               | 2064              | 64        |
| Myeloid  | 1/34                        | 3         | 78                | 1/25                        | 4         | 23                | 101               | 3         |
| Total    | 34                          | 100       | 2611              | 25                          | 100       | 596               | 3207              | 100       |

| BM       | BRE GFP+                    |           |                   | BRE GFP-                    |           |                   | Total             |           |
|----------|-----------------------------|-----------|-------------------|-----------------------------|-----------|-------------------|-------------------|-----------|
|          | subtype/total reconstituted | % subtype | Absolute cell no. | subtype/total reconstituted | % subtype | Absolute cell no. | Absolute cell no. | % subtype |
| Balanced | 7/17                        | 41        | 45                | 0/15                        | 0         | 0                 | 45                | 4         |
| Lymphoid | 8/17                        | 47        | 52                | 8/15                        | 53        | 567               | 619               | 53        |
| Myeloid  | 2/17                        | 12        | 13                | 7/15                        | 47        | 497               | 510               | 43        |
| Total    | 17                          | 100       | 110               | 15                          | 100       | 1064              | 1174              | 100       |

### Supplementary Reference

- 1 Cho, R. H., Sieburg, H. B. & Muller-Sieburg, C. E. A new mechanism for the aging of hematopoietic stem cells: aging changes the clonal composition of the stem cell compartment but not individual stem cells. *Blood* **111**, 5553-5561, (2008).
